# Supplementary material for: Design of functionalized β-ketoenole derivatives as efficient fluorescent dyes for detection of amyloid fibrils
Source: Royal Society of Chemistry journal article supplement (doi:10.1039/c8nj01020j), 2018-01-01
Supplement: c8nj01020j1.pdf [file c8nj01020j1.pdf]

**SUPPLEMENTARY MATERIALS**

*Table 1S Quantum yields of  $\beta$ -ketoenole dyes in the presence of native insulin*

| Name         | with native insulin |
|--------------|---------------------|
|              | QY                  |
| 1            | 0.085               |
| 2            | <0.02*              |
| 3            | <0.02*              |
| 4            | 0.036               |
| 5            | 0.027               |
| 6            | 0.037               |
| 7            | <0.02*              |
| 8            | <0.02*              |
| 9            | <0.02*              |
| 10           | <0.02*              |
| Thioflavin T | <0.02*              |

\*Measured values of quantum yield less than 2% is below threshold of the integrating sphere

*Table 2S Absorption spectra  $\beta$ -ketoenole dyes in free state and in the presence of fibrillar insulin*

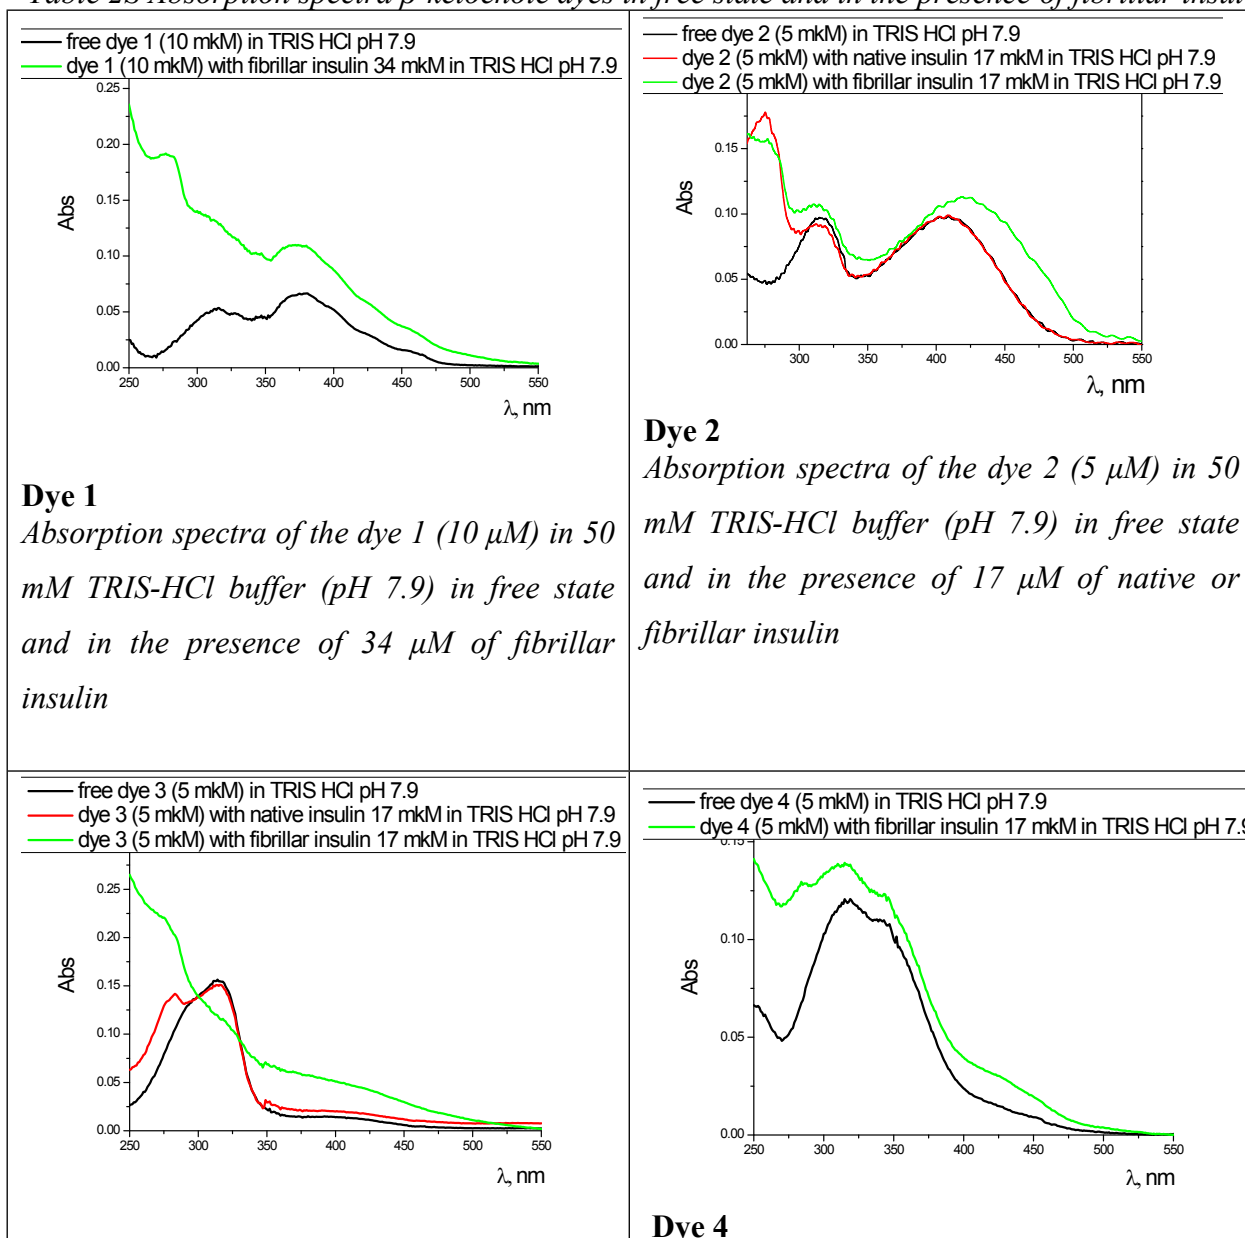

**Dye 3**

*Absorption spectra of the dye 3 (5  $\mu$ M) in 50 mM TRIS-HCl buffer (pH 7.9) in free state and in the presence of 17  $\mu$ M of native or fibrillar insulin*

*Absorption spectra of the dye 4 (5  $\mu$ M) in 50 mM TRIS-HCl buffer (pH 7.9) in free state and in the presence of 17  $\mu$ M of fibrillar insulin*

— free dye 5 (5 mkM) in TRIS HCl pH 7.9  
— dye 5 (5 mkM) with fibrillar insulin 17 mkM in TRIS HCl pH 7.9

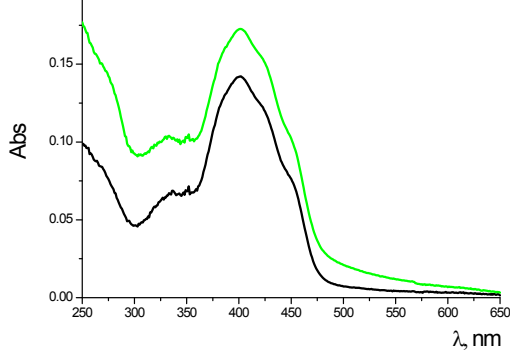**Dye 5**

*Absorption spectra of the dye 5 (5  $\mu$ M) in 50 mM TRIS-HCl buffer (pH 7.9) in free state and in the presence of 17  $\mu$ M of fibrillar insulin*

— free dye 6 (5 mkM) in TRIS HCl pH 7.9  
— dye 6 (5 mkM) with fibrillar insulin 17 mkM in TRIS HCl pH 7.9

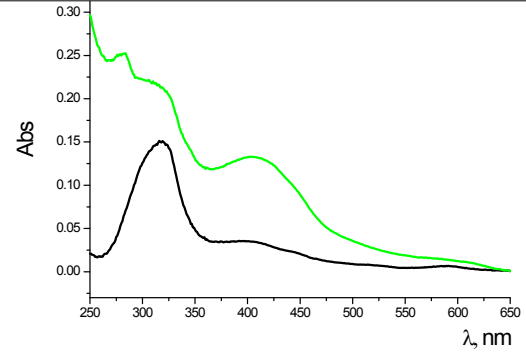**Dye 6**

*Absorption spectra of the dye 6 (5  $\mu$ M) in 50 mM TRIS-HCl buffer (pH 7.9) in free state and in the presence of 17  $\mu$ M of fibrillar insulin*

— free dye 7 (5 mkM) in TRIS HCl pH 7.9  
— dye 7 (5 mkM) with fibrillar insulin 17 mkM in TRIS HCl pH 7.9

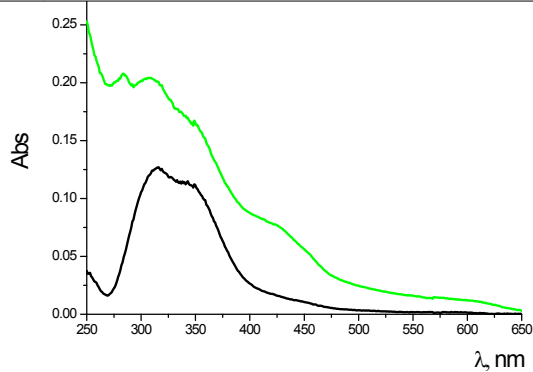**Dye 7**

*Absorption spectra of the dye 7 (5  $\mu$ M) in 50 mM TRIS-HCl buffer (pH 7.9) in free state and in the presence of 17  $\mu$ M of fibrillar insulin*

— free dye 8 (5 mkM) in TRIS HCl pH 7.9  
— dye 8 (5 mkM) with fibrillar insulin 17 mkM in TRIS HCl pH 7.9

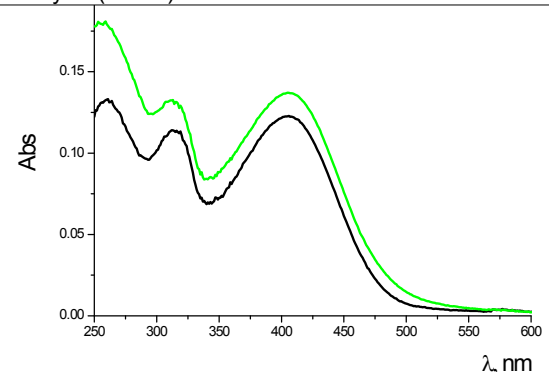**Dye 8**

*Absorption spectra of the dye 8 (5  $\mu$ M) in 50 mM TRIS-HCl buffer (pH 7.9) in free state and in the presence of 17  $\mu$ M of fibrillar insulin*

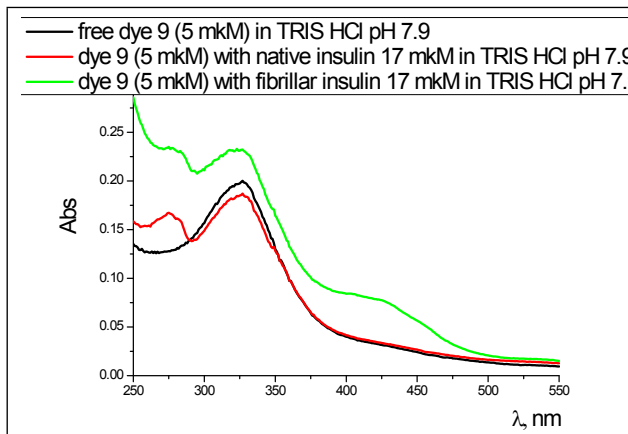

**Dye 9**  
*Absorption spectra of the dye 9 (5 μM) in 50 mM TRIS-HCl buffer (pH 7.9) in free state and in the presence of 17 μM of native or fibrillar insulin*

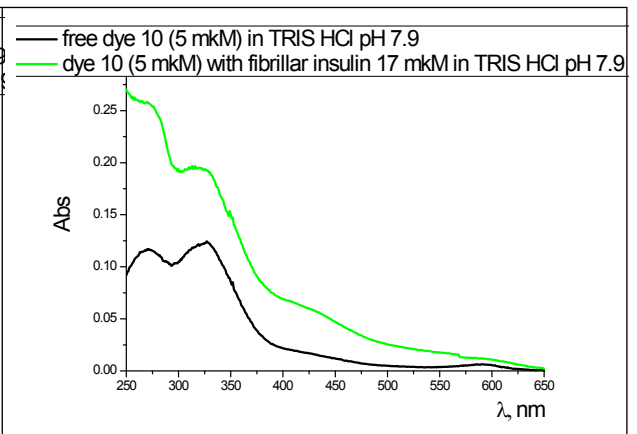

**Dye 10**  
*Absorption spectra of the dye 10 (5 μM) in 50 mM TRIS-HCl buffer (pH 7.9) in free state and in the presence of 17 μM of fibrillar insulin*
